# Supplementary material for: Common Medications and Intracerebral Hemorrhage: The ARIC Study
Source: PubMed Central journal article supplement — J Am Heart Assoc. 2021 Feb 15;10(5):e014270. doi: 10.1161/JAHA.120.014270 (PMC8174245; doi:10.1161/jaha.120.014270), 2021-02-15
Supplement: JAH3-10-e014270-s001.pdf [file JAH3-10-e014270-s001.pdf]

# **SUPPLEMENTAL MATERIAL**

**Table S1. Codes available to extract anti-hypertensive medication usage by ARIC Visit.**

| Visit 1             | Visit 2 | Visit 3 | Visit 4 | Annual Follow-Up Phone Call 2004-2007 | Visit 5        |
|---------------------|---------|---------|---------|---------------------------------------|----------------|
| Apresazide          | 109534  | 109534  | 109534  | Amlodipine                            | 37600040000305 |
| Calan               | 107371  | 107371  | 107371  | Apresazide                            | 36992002130320 |
| Captopril           | 109516  | 109516  | 109516  | Atenolol                              | 37600040000310 |
| Cardizem            | 108955  | 108955  | 108955  | Benazepril                            | 37600040000110 |
| Catapress           | 118787  | 118787  | 118787  | Benicar                               | 36400010100305 |
| Chlorthalidone      | 110671  | 110671  | 110671  | Caduet                                | 37500020000305 |
| Clonidine           | 117658  | 117658  | 117658  | Calan                                 | 37500020000310 |
| Diltiazem           | 116025  | 116025  | 116025  | Calan                                 | 33100040100315 |
| Dyazide             | 105684  | 105684  | 105684  | Captopril                             | 37990002300330 |
| Furosemide          | 110239  | 110239  | 110239  | Captopril/Hydrochlorothia             | 37990002300315 |
| HCTZ                | 115606  | 115606  | 115606  | Cardizem                              | 37990002300105 |
| Hydralazine         | 112492  | 112492  | 112492  | Cartia                                | 32100025007520 |
| Hydrochlorot        | 119344  | 119344  | 119344  | Catapia                               | 32100020000405 |
| Hydrochlorothiazide | 106000  | 106000  | 106000  | Catapress                             | 36201010100315 |
| Inderal             | 109963  | 109963  | 109963  | Chlorthalidone                        | 34000020007570 |
| Inderide            | 112023  | 112023  | 112023  | Clonidine                             | 36100010000310 |
| Isordil             | 101475  | 101475  | 101475  | Diltiazem                             | 33100040107025 |
| Isosorbide          | 111651  | 111651  | 111651  | Diovan                                | 34000030100420 |
| Lozol               | 117661  | 117661  | 117661  | Dyazide                               | 34000030100410 |
| Maxzide             | 102382  | 102382  | 102382  | Enalapril                             | 33200020000305 |
| Metholazone         | 104461  | 104461  | 104461  | Felodipine                            | 33200020000303 |
| Minipres            | 121446  | 121446  | 121446  | Furosemide                            | 33200020000310 |
| Moduretic           | 115074  | 115074  | 115074  | HCTZ                                  | 34000010107040 |
| Nifedipine          | 116867  | 116867  | 116867  | Hydralazine                           | 34000010106910 |
| Normazide           | 109480  | 109480  | 109480  | Hydrochlorot                          | 33100040107040 |
| Normodyne           | 119682  | 119682  | 119682  | Hydrochlorothiazide                   | 36150080000320 |
| Prazosin            | 107888  | 107888  | 107888  | Hyzaar                                | 36994002700370 |
| Prinivil            | 121424  | 121424  | 121424  | Inderal                               | 36150080000330 |
| Prinzide            | 107870  | 107870  | 107870  | Inderide                              | 36994002700350 |
| Procard             | 116017  | 116017  | 116017  | Isordil                               | 36150080000340 |
| Procardia           | 109495  | 109495  | 109495  | Isosorbide                            | 34000020007550 |
| Propranolol         | 104472  | 104472  | 104472  | Lisinopril                            | 36100030000310 |
| Spirolactone        |         |         |         | Lozol                                 | 36100030000330 |
| Triameter           |         |         |         | Maxzide                               | 36100030000305 |
| Verapamil           |         |         |         | Metholazone                           | 36991802550320 |
|                     |         |         |         | Minipres                              | 34000003100330 |
|                     |         |         |         | Moduretic                             | 34000003100340 |
|                     |         |         |         |                                       | 34000003100320 |

|         |  |  |  |              |                |
|---------|--|--|--|--------------|----------------|
| Zestril |  |  |  | Nadalol      | 36991802550320 |
|         |  |  |  | Nifedipine   | 36100030000315 |
|         |  |  |  | Normazide    | 36150040200330 |
|         |  |  |  | Normodyne    | 36994002450320 |
|         |  |  |  | Norvasc      | 36150040200340 |
|         |  |  |  | Prazosin     | 36993002050340 |
|         |  |  |  | Prinivil     | 36993002050320 |
|         |  |  |  | Prinzide     | 36150055200340 |
|         |  |  |  | Procard      | 36994002500320 |
|         |  |  |  | Procardia    | 36100050000140 |
|         |  |  |  | Propranolol  | 33300007000310 |
|         |  |  |  | Spirolactone | 33300007000320 |
|         |  |  |  | Terazosin    | 33300007000330 |
|         |  |  |  | Triameter    | 36202040100115 |
|         |  |  |  | Verapamil    | 36991802550305 |
|         |  |  |  | Zestril      | 36991802550310 |
|         |  |  |  |              | 36991802550320 |
|         |  |  |  |              | 36202005100320 |
|         |  |  |  |              | 36202005100340 |
|         |  |  |  |              | 36994002450340 |
|         |  |  |  |              | 36150040200330 |
|         |  |  |  |              | 36991802550305 |
|         |  |  |  |              | 36100020100310 |
|         |  |  |  |              | 36992002100310 |
|         |  |  |  |              | 33200020000303 |
|         |  |  |  |              | 36994002600340 |
|         |  |  |  |              | 36991502200160 |
|         |  |  |  |              | 36991502200140 |
|         |  |  |  |              | 36992002130320 |
|         |  |  |  |              | 36201010100305 |
|         |  |  |  |              | 36994503450330 |
|         |  |  |  |              | 36991802650330 |

**Table S2. Codes available to extract thyroid medication usage by ARIC Visit.**

| Visit 1                                             | Visit 2 | Visit 3 | Visit 4 | AFU                                                 | Visit 5                                                                                                                                                        |
|-----------------------------------------------------|---------|---------|---------|-----------------------------------------------------|----------------------------------------------------------------------------------------------------------------------------------------------------------------|
| Levothroid<br>Levothyroxine<br>Synthroid<br>Thyroid | 110586  | 110586  | 110586  | Levothroid<br>Levothyroxine<br>Synthroid<br>Thyroid | 28100010100310<br>28100010100315<br>28100010100317<br>28100010100320<br>28100010100322<br>28100010100325<br>28100010100327<br>28100010100330<br>28100010100335 |
